# Supplementary material for: Ordered growth of metal oxides in patterned multi-angle microstructures
Source: Royal Society of Chemistry journal article supplement (doi:10.1039/d3ra01423a), 2023-01-01
Supplement: d3ra01423a1.pdf [file d3ra01423a1.pdf]

## Ordered Growth of Metal Oxides in Patterned Multi-Angle Microstructures

*Zhenkai Ji, Min Sun, Tiantian Chen, Xinyi Shen, Xiuzhen Xu, Yan Zhong, Dadong Wang,  
Jiwei Ma, Bo Chen\*, Zhiguo Yi, and Xiaobin Xu\**

Z. Ji, M. Sun, T. Chen, X. Shen, X. Xu, J. Ma, B. Chen, X. Xu

Key laboratory of Advanced Civil Engineering Materials of Ministry of Education,  
Shanghai. Key Lab. of D&A for Metal-Functional Materials, School of Materials Science &  
Engineering, & Institute for Advanced Study, Tongji University, Shanghai 201804, China  
E-mail: xiaobinxu@tongji.edu.cn

Z. Ji, Z. Yi

State Key Laboratory of High Performance Ceramics and Superfine Microstructure,  
Shanghai Institute of Ceramics, Chinese Academy of Sciences, Shanghai 200050, China  
University of Chinese Academy of Sciences, Beijing 100049, China

Y. Zhong, D. Wang

Shanghai Highway Investment Construction and Development Co.,Ltd., Shanghai 200336,  
China

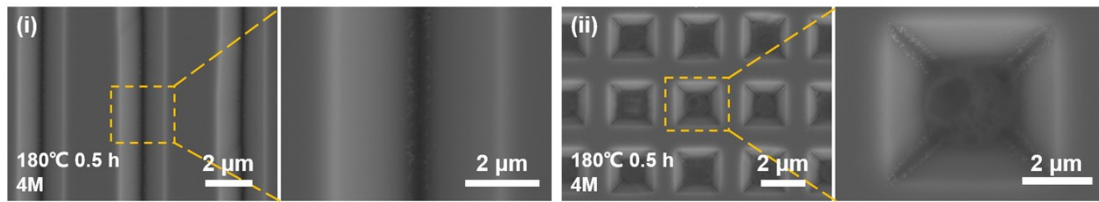

**Fig. S1** (i) The morphology of TiO<sub>2</sub> nanostructure on linear template substrate (reaction concentration: 4 M). (ii) SEM image of the TiO<sub>2</sub> nanostructures on inverted-pyramid arrays substrate (reaction concentration: 4 M). Scale bars: 2 μm.

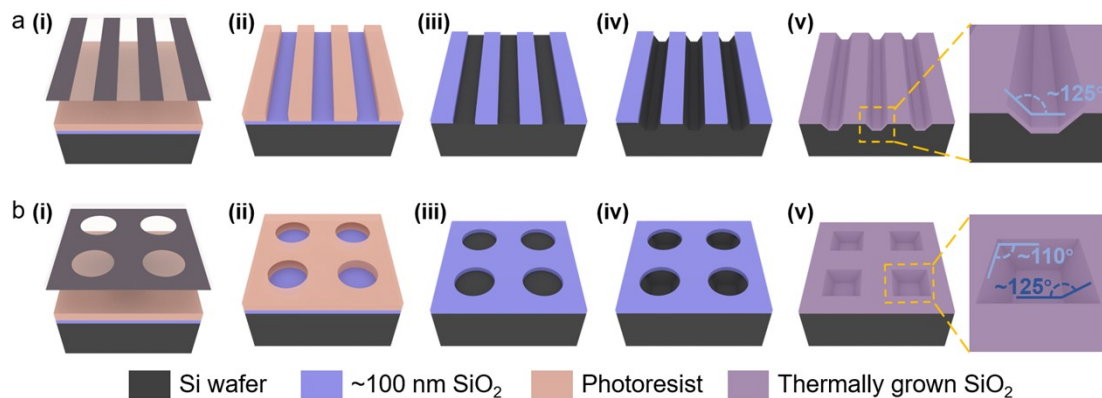

**Fig. S2** The schematic details the different substrate templates developed using the traditional top-down approach. (a) The linear composite template. (b) The toroidal composite template. (i) Transferring the pattern from the mask to the photoresist on the silicon substrate by UV light using photolithography. (ii) After development, patterned photoresist is formed on the silicon substrate. (iii) The exposed silicon dioxide film is etched through dry etching method. (iv) After a period of wet-etching in a hot alkaline solution, nanostructures are produced on the surface of the silicon wafer. (v) The substrate surface is cleaned and then calcined in a muffle furnace to form a SiO<sub>2</sub>-Si template.
